# Supplementary material for: 2-Deoxyglycosylation towards more effective and bioavailable neuroprotective molecules inspired by nature
Source: publisher site journal article supplement (doi:10.1515/pac-2019-0303), 2019-06-12
Supplement: Supplementary file 1 [file pac-2019-0303_suppl.docx]

***Supporting Information for***

2-Deoxy glycosylation towards more effective and bioavailable neuroprotective molecules inspired by nature

Catarina Dias,1,2 Ana M. Matos,1,2,3 Maria T. Blásquez-Sanchez,1,2 Patrícia Calado,1,2 Alice Martins,1,2 Philipp Dätwyler,4 Beat Ernst,4 M. Paula Macedo,3,5 Nicola Colabufo,6 Amélia P. Rauter.1,2,*

***1H and 13C NMR spectra of final products***


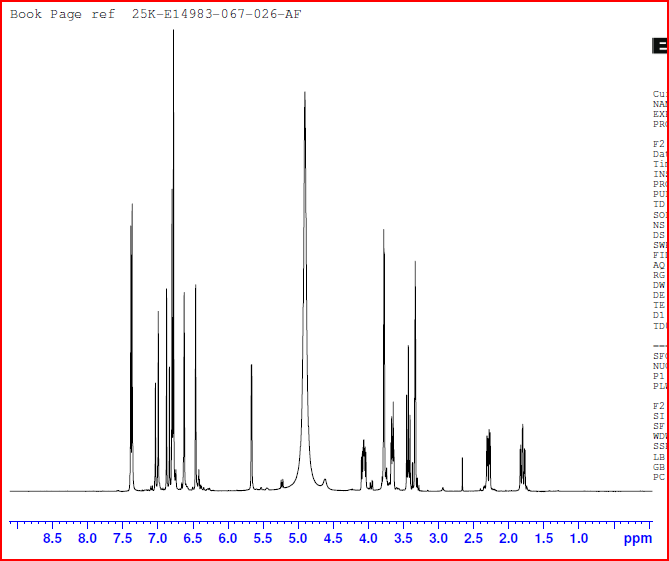


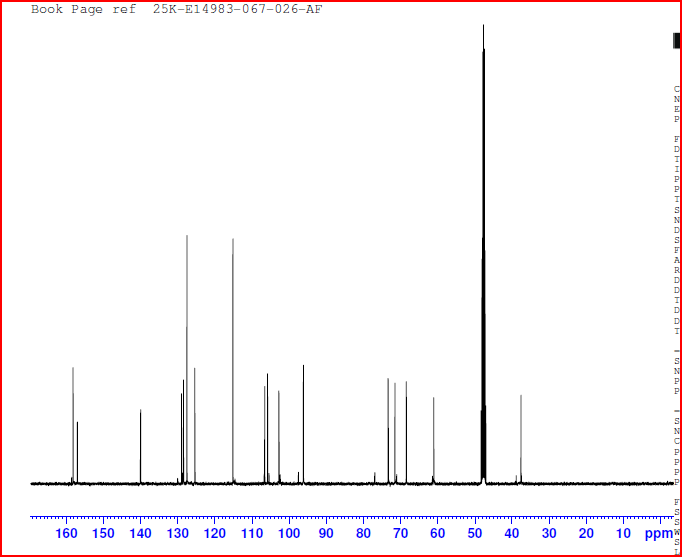


**Fig. S1.** *1H and 13C NMR spectra of compound* ***6****.*


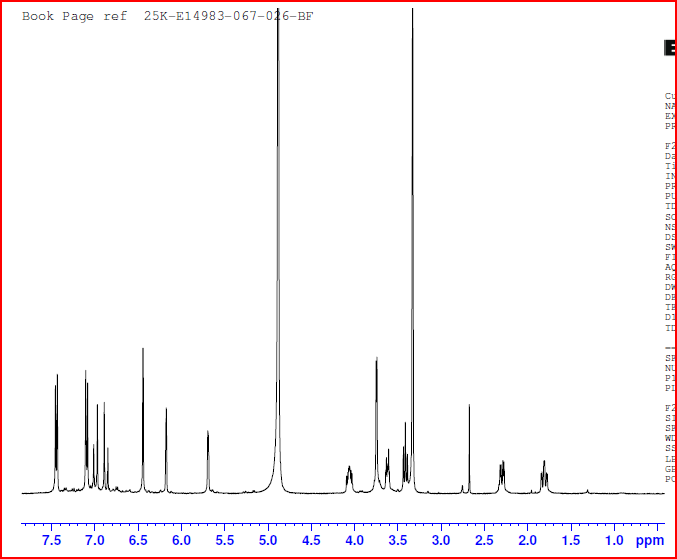


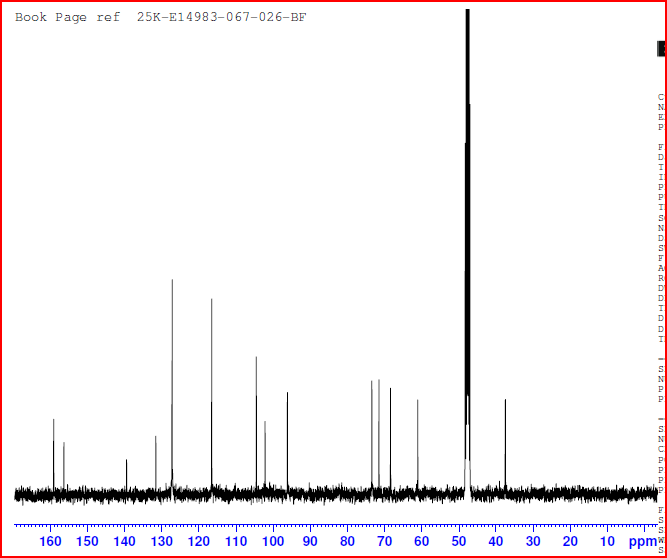


**Fig. S2.** *1H and 13C NMR spectra of compound* ***7.***


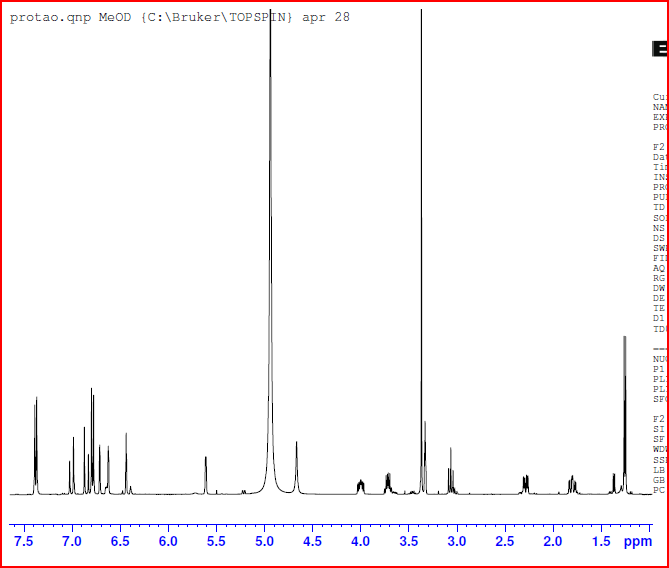


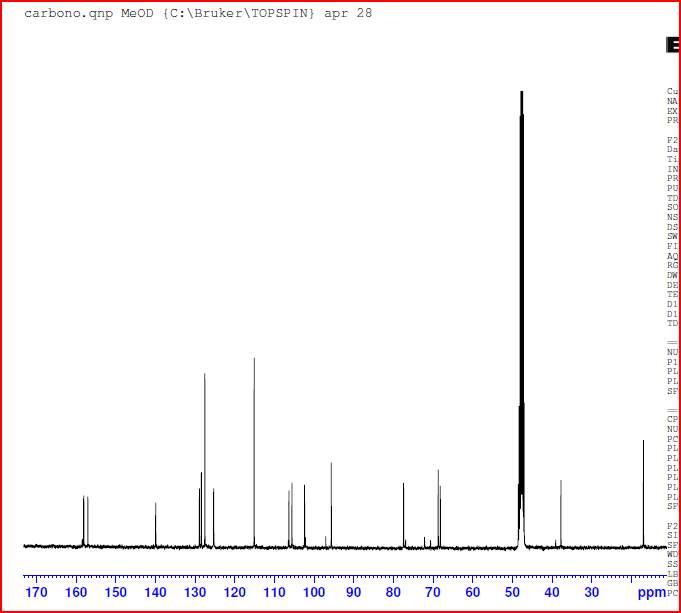


**Fig. S3.** *1H and 13C NMR spectra of compound* ***10.***


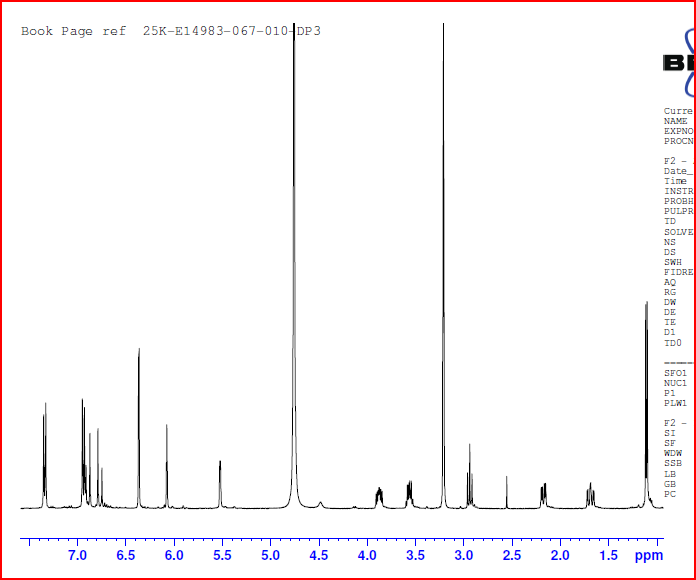


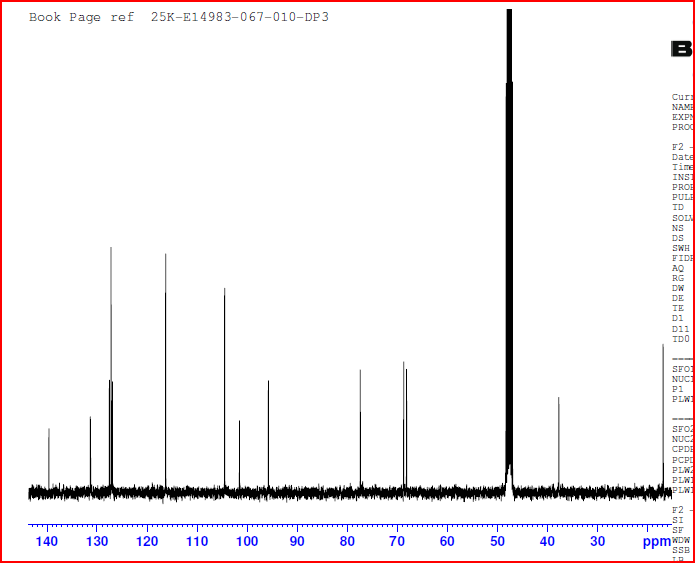


**Fig. S4.** *1H and 13C NMR spectra of compound* ***11.***


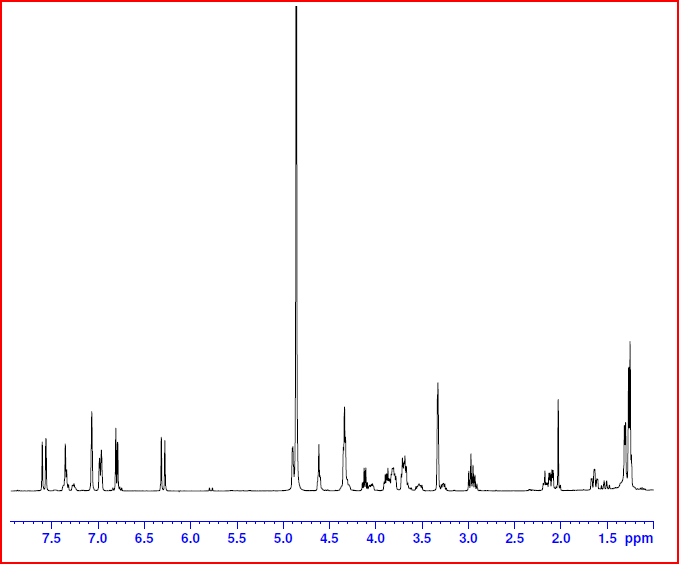


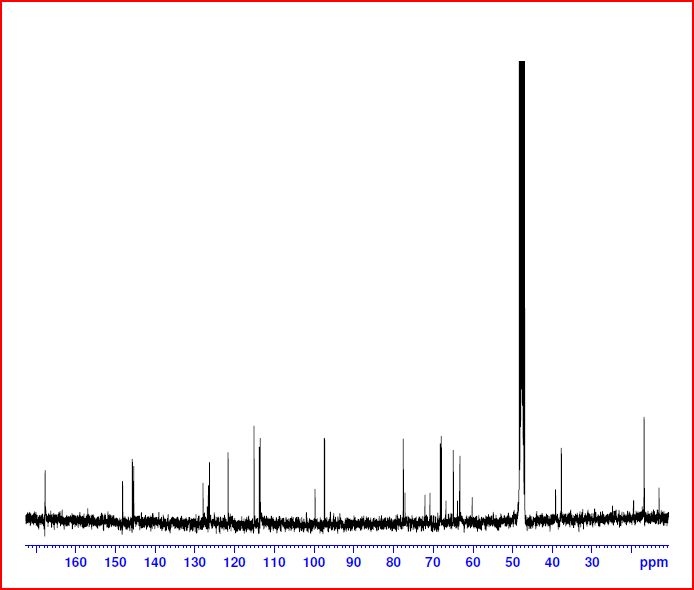


**Fig. S5.** *1H and 13C NMR spectra of compounds* ***17a,b.***
